# Supplementary material for: Removal of point-of-sale tobacco displays in Bogor city, Indonesia: A spatial analysis
Source: PubMed Central journal article supplement — Tob Prev Cessat. 2020 Apr 6;6:22. doi: 10.18332/tpc/118236 (PMC7291908; doi:10.18332/tpc/118236), 2020-04-06
Supplement: TPC-6-22-s1.pdf [file TPC-6-22-s1.pdf]

## SUPPLEMENTARY ONLINE APPENDIX

The authors have provided this appendix to give readers additional information about their work.

Supplement to: Removal of point-of-sale tobacco displays in Bogor city, Indonesia: Spatial analysis

(Updated Dec 10, 2019)

### Appendix. Characteristics of subdistricts in Bogor city, 2017

| Subdistrict   | Population       | Area size<br>km <sup>2</sup> | Population<br>Density per km <sup>2</sup> | 4 x number of<br>poorer families | Proxy for<br>poverty rate |
|---------------|------------------|------------------------------|-------------------------------------------|----------------------------------|---------------------------|
| North Bogor   | 196,051          | 17.7                         | 11,064                                    | 15,076                           | 8%                        |
| West Bogor    | 239,860          | 32.9                         | 7,302                                     | 25,928                           | 11%                       |
| East Bogor    | 106,029          | 10.2                         | 10,446                                    | 14,284                           | 13%                       |
| South Bogor   | 201,618          | 30.8                         | 6,544                                     | 29,164                           | 14%                       |
| Tanah Sareal  | 232,598          | 18.8                         | 12,346                                    | 43,520                           | 19%                       |
| Central Bogor | 104,853          | 8.1                          | 12,897                                    | 32,880                           | 31%                       |
| <b>TOTAL</b>  | <b>1,081,009</b> | <b>118.5</b>                 | <b>10,100</b>                             | <b>26,809</b>                    | <b>16%</b>                |

*Note: Proxy for poverty rate is by adding number of families from the poorer categories (pra-sejahtera and sejahtera I) and multiplying by 4 (average family size) and dividing by subdistrict population. The aim was to provide some information on socioeconomic variation by subdistrict, not to estimate the official poverty rate in Bogor City. (Source: Bogor City in Numbers, 2018)*

© 2020 Priyono B.
